# Supplementary material
Source: PubMed Central journal article supplement (PMC4612372)

**Supplementary Table 1: Proteins uniquely associated with the LAPosome**

| <b>Protein</b>   | <b>Description</b>                                                   | <b>Log2<br/>(IgG-bead /<br/>Inert-bead)</b> | <b>Log2<br/>(Pam3csk4-bead /<br/>Inert-bead)</b> | <b>Log2<br/>(Avg)</b> |
|------------------|----------------------------------------------------------------------|---------------------------------------------|--------------------------------------------------|-----------------------|
| <b>Rubicon</b>   | Run domain Beclin-1 interacting and cysteine-rich containing protein | 1.21                                        | 1.35                                             | 1.28                  |
| <b>Prkcd</b>     | Protein kinase C $\delta$                                            | 1.91                                        | 2.63                                             | 2.23                  |
| <b>Lgals3</b>    | Galectin-3                                                           | 3.21                                        | 2.93                                             | 3.07                  |
| <b>Ifitm3</b>    | Interferon-induced transmembrane protein 2                           | 2.36                                        | 1.66                                             | 2.01                  |
| <b>Srrm2</b>     | Serine/arginine repetitive matrix protein 2                          | 2.19                                        | 1.85                                             | 2.02                  |
| <b>Myof</b>      | Myoferlin                                                            | 3.13                                        | 2.68                                             | 2.89                  |
| <b>2-Sep</b>     | Septin-2                                                             | 1.55                                        | 1.92                                             | 1.995                 |
| <b>Ap2s1</b>     | AP-2 complex subunit $\zeta$ 1                                       | 2.63                                        | 2.25                                             | 2.44                  |
| <b>Trim33</b>    | E3 ubiquitin-protein ligase                                          | 2.58                                        | 1.69                                             | 2.135                 |
| <b>Xrcc5</b>     | X-ray repair cross-complementing protein 5                           | 1.03                                        | 5.98                                             | 3.505                 |
| <b>Lalba</b>     | Lactalbumin- $\alpha$                                                | 5.23                                        | 1.39                                             | 3.31                  |
| <b>Saa3</b>      | Serum amyloid A-3                                                    | 3.43                                        | 2.54                                             | 2.985                 |
| <b>Hck</b>       | Tyrosine-protein kinase HCK                                          | 2.28                                        | 1.81                                             | 2.045                 |
| <b>Tmem206</b>   | Transmembrane protein 206                                            | 1.71                                        | 2.44                                             | 2.075                 |
| <b>Snx20</b>     | Sorting nexin-20                                                     | 2.37                                        | 2.83                                             | 2.6                   |
| <b>Atp8b3</b>    | ATPase, class I, type 8B, member 3                                   | 0.96                                        | 0.81                                             | 0.89                  |
| <b>Reps1</b>     | RalBP1-associated Eps domain-containing protein 1                    | 4.87                                        | 1.29                                             | 3.08                  |
| <b>Gabarap</b>   | Gamma-aminobutyric acid receptor-associated protein                  | 2.04                                        | 2.33                                             | 2.185                 |
| <b>Gabarapl1</b> | Gamma-aminobutyric acid receptor-associated protein-like 1           | 1.17                                        | 1.77                                             | 1.47                  |
| <b>Map1lc3b</b>  | Microtubule-associated proteins 1A/1B light chain 3B                 | 0.91                                        | 0.71                                             | 0.81                  |
| <b>Pik3c3</b>    | Phosphatidylinositol 3-kinase catalytic subunit type 3               | 1.09                                        | 1.17                                             | 1.13                  |
| <b>Atg3</b>      | Ubiquitin-like-conjugating enzyme ATG3                               | N/A                                         | 0.72                                             | 0.72                  |
| <b>Atg9</b>      | Autophagy 9-like 1 protein                                           | 0.89                                        | 0.53                                             | 0.71                  |

# Supplementary Figure 1: LAP is a pathway distinct from canonical autophagy.

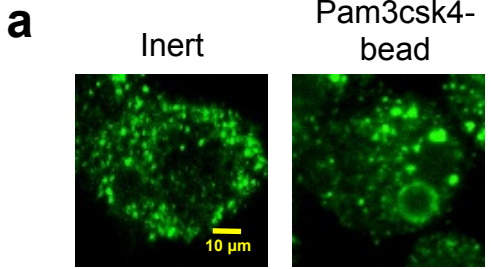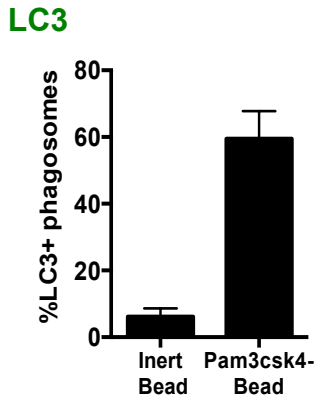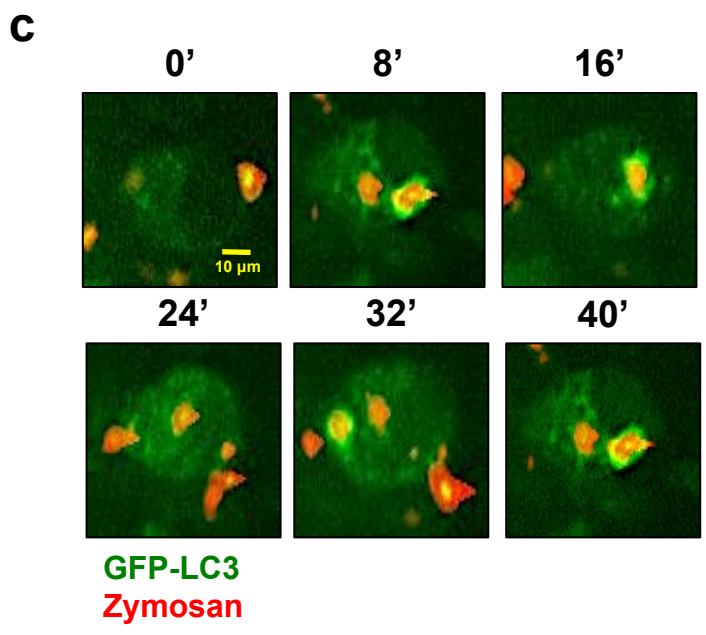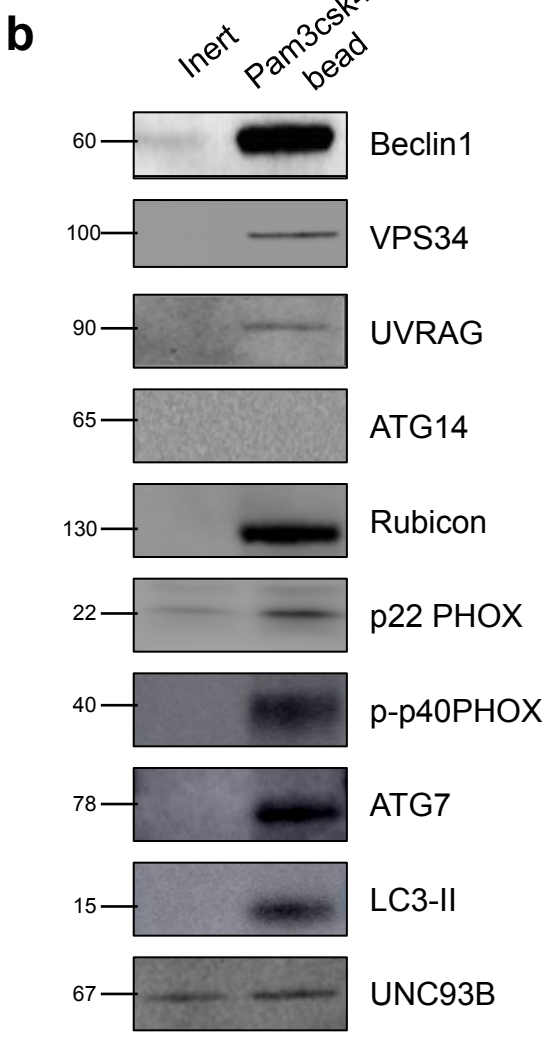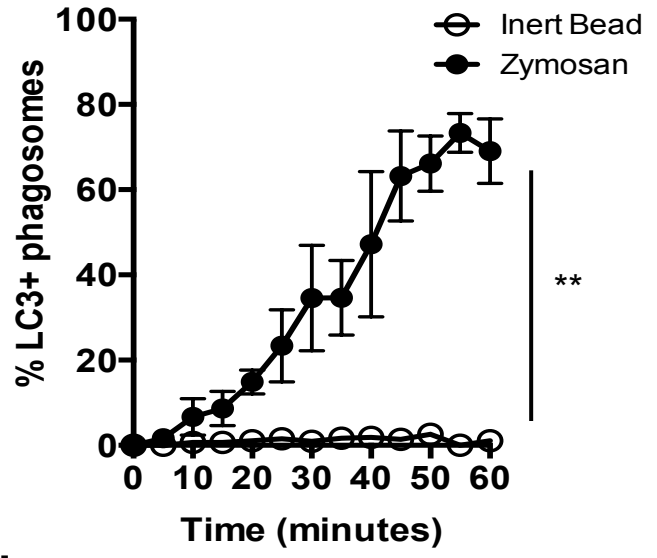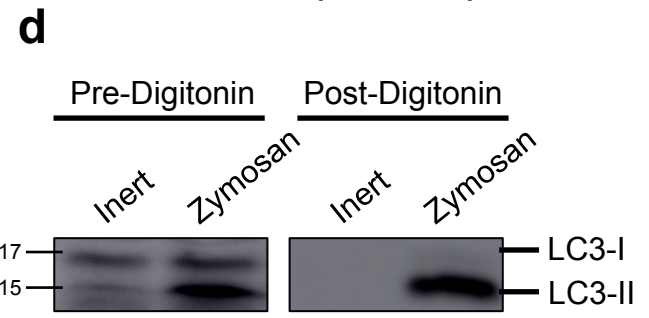

# Supplementary Figure 2: Generation of the Rubicon-deficient mouse model using the CRISPR/Cas9 method.

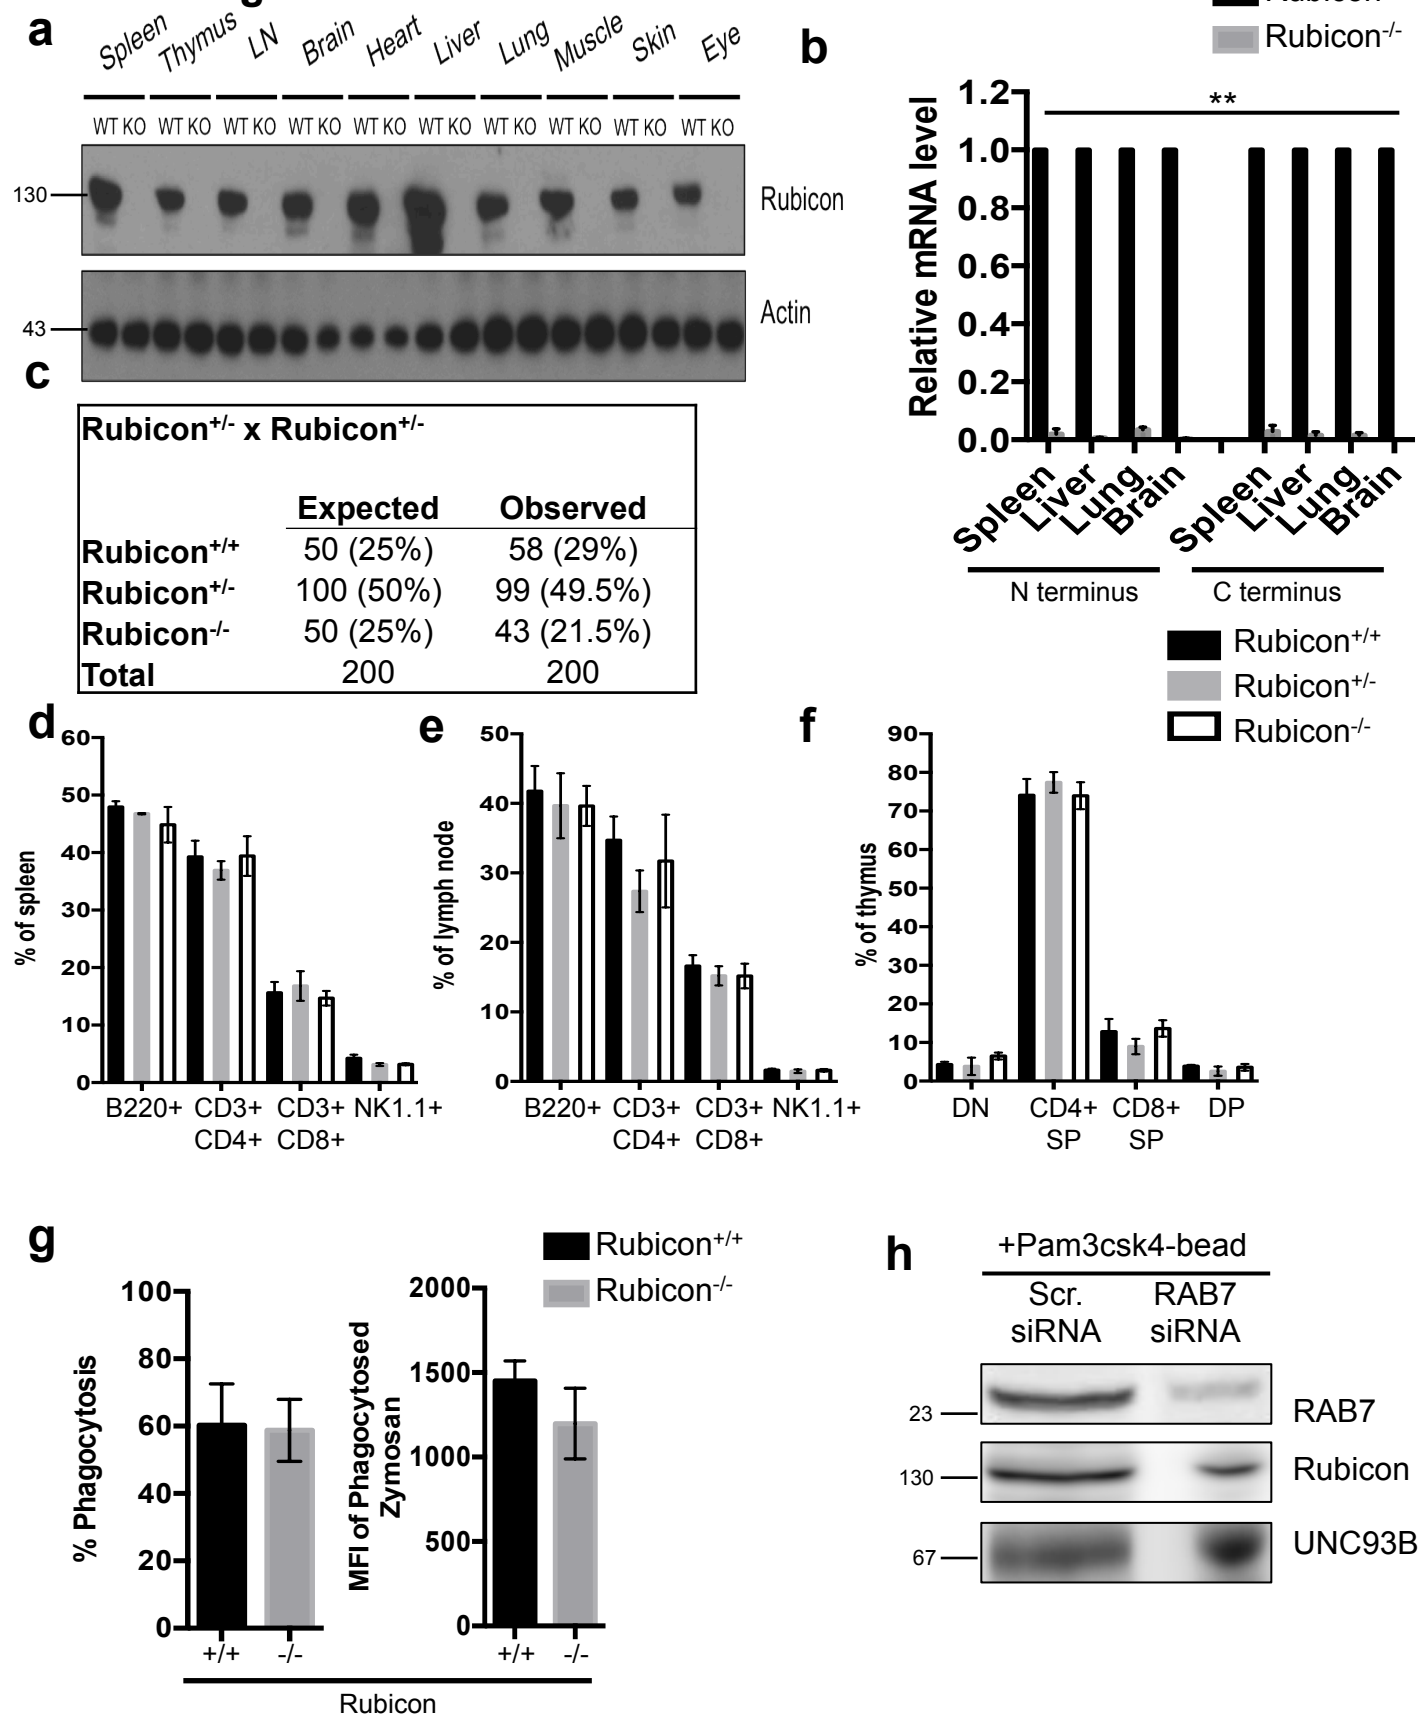

# Supplementary Figure 3: LAP occurs independently of the pre-initiation complex.

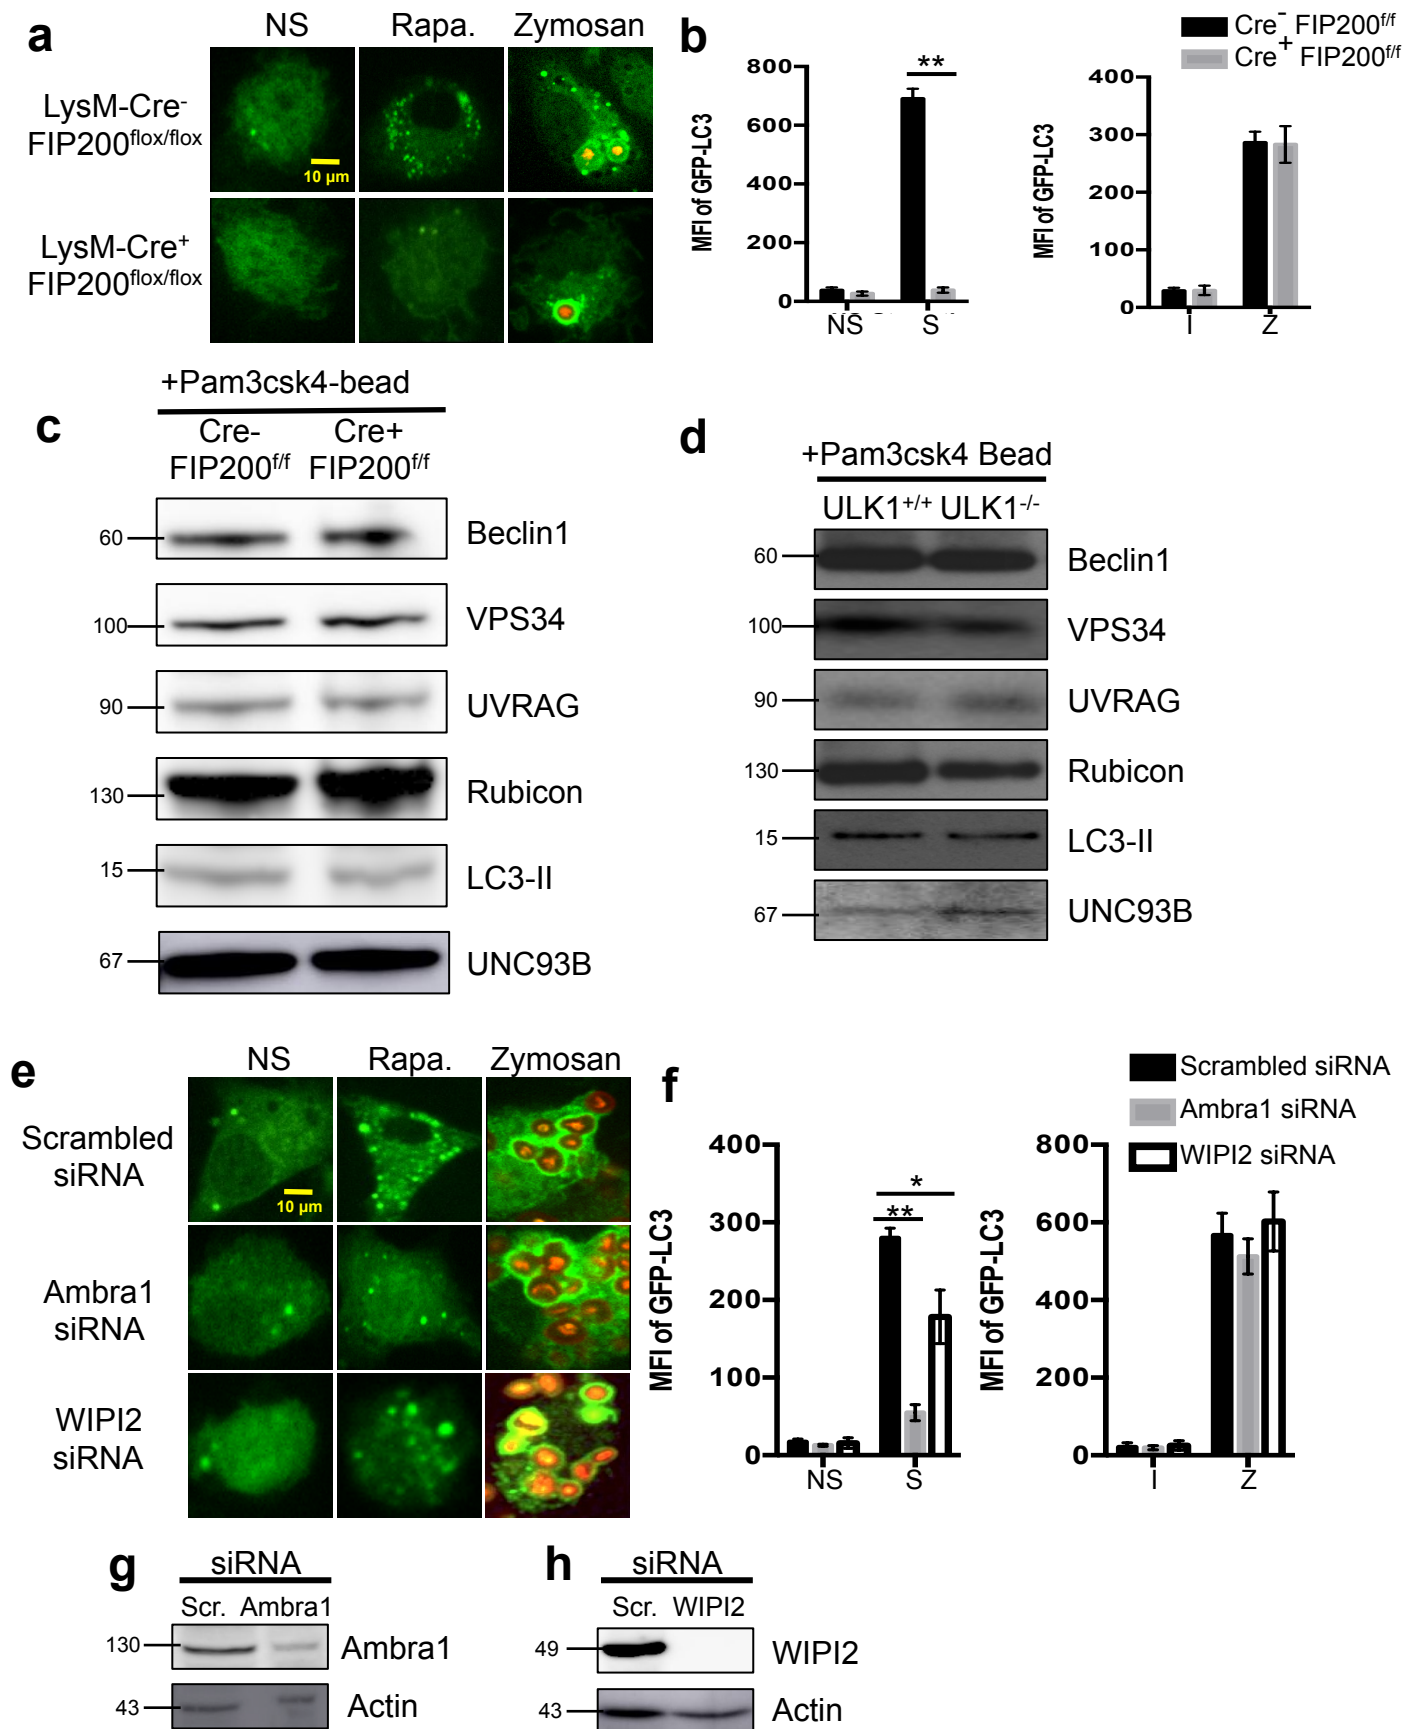

# Supplementary Figure 4: LAP utilizes a UVRAG-containing Class III PI3K complex.

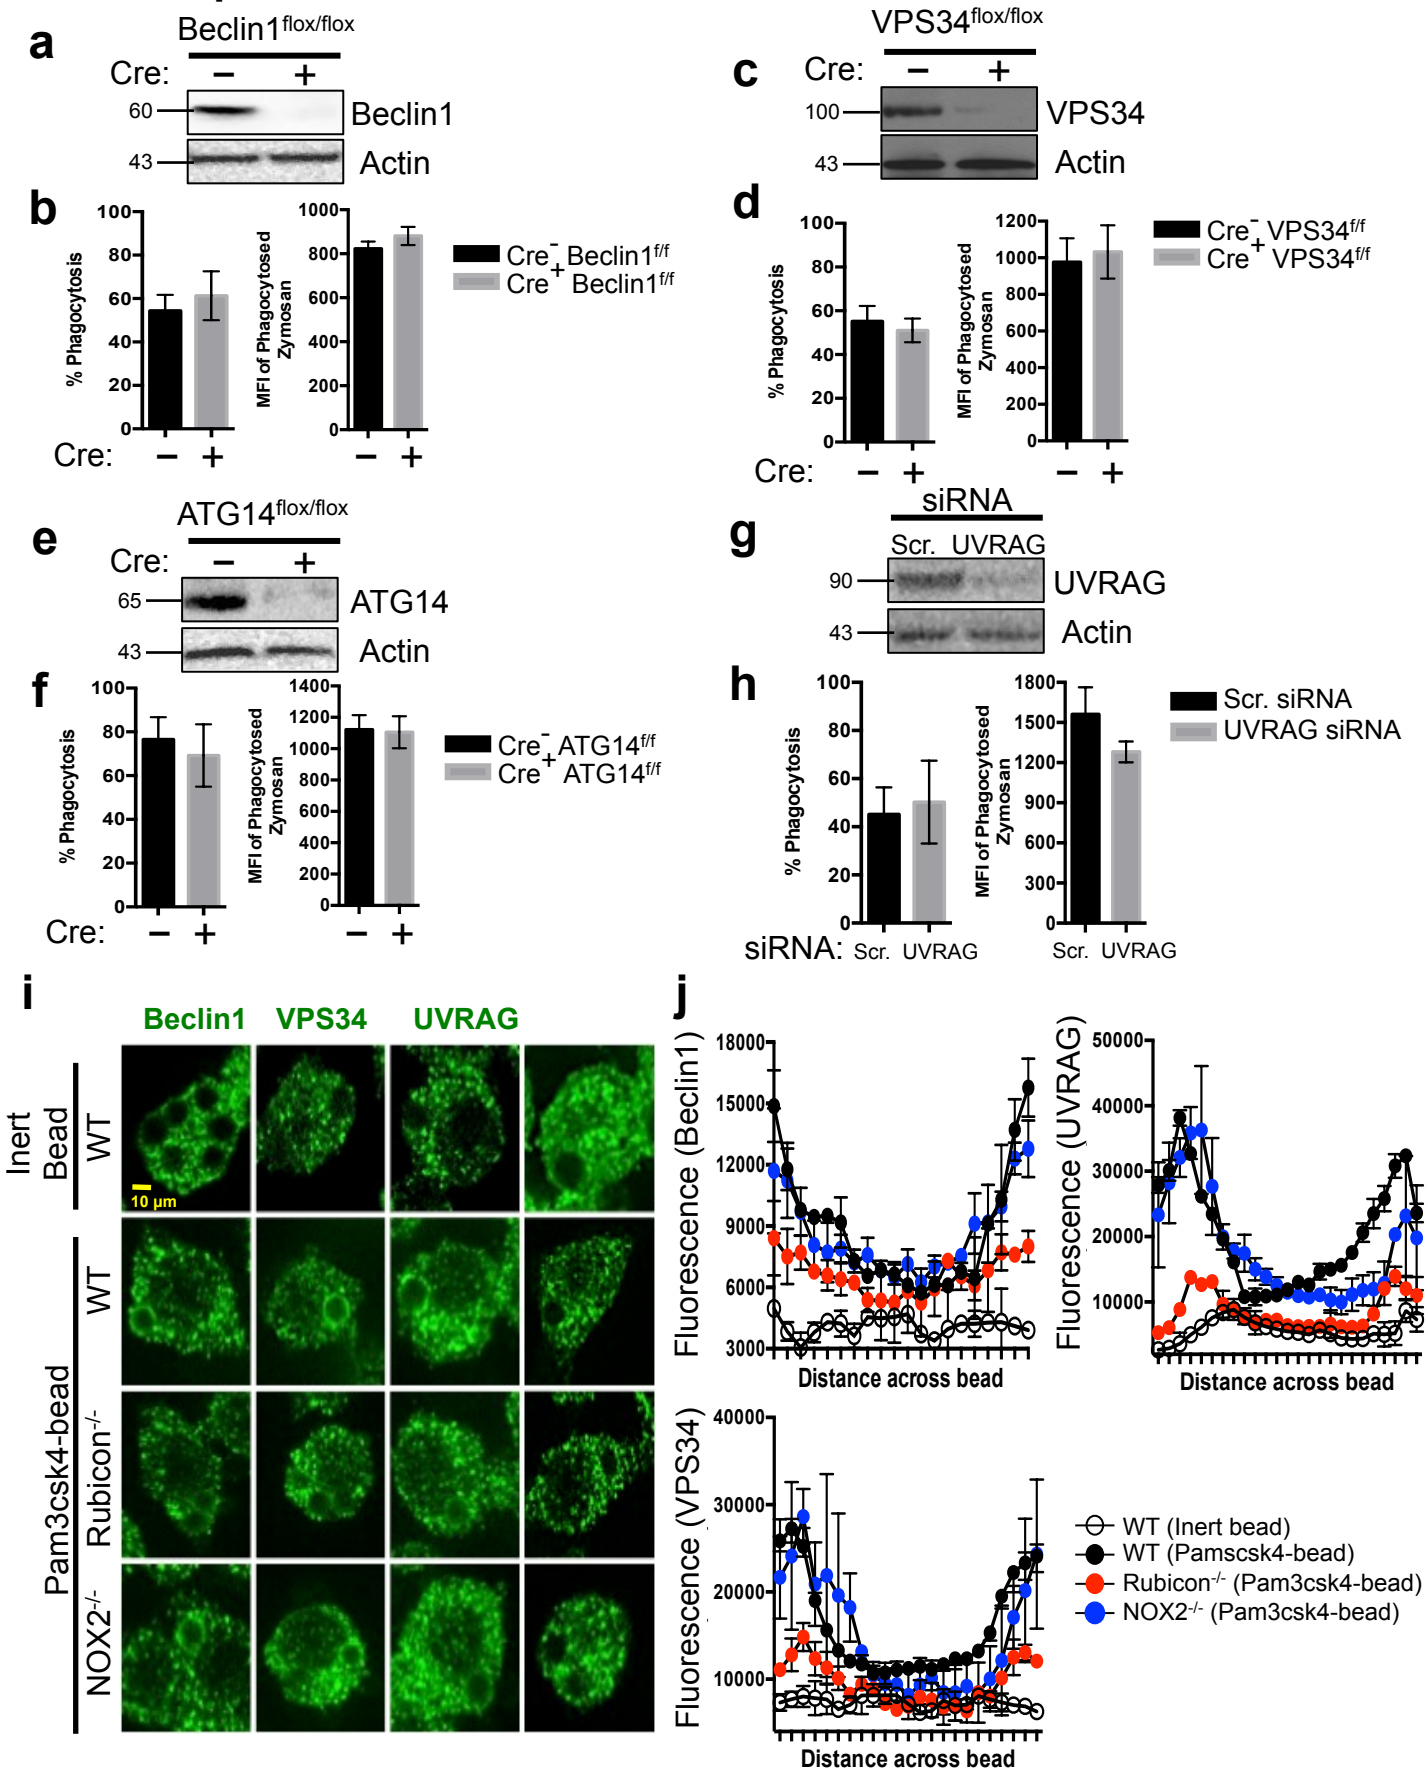

# Supplementary Figure 5: NOX2 is downstream of the Class III PI3K complex and required for LAP

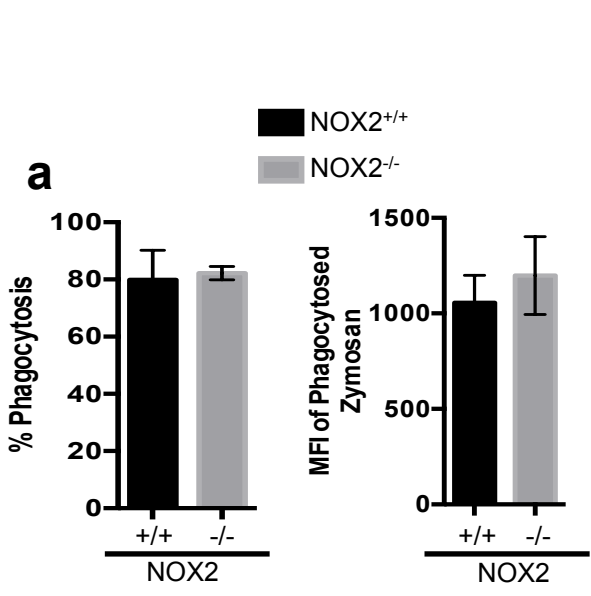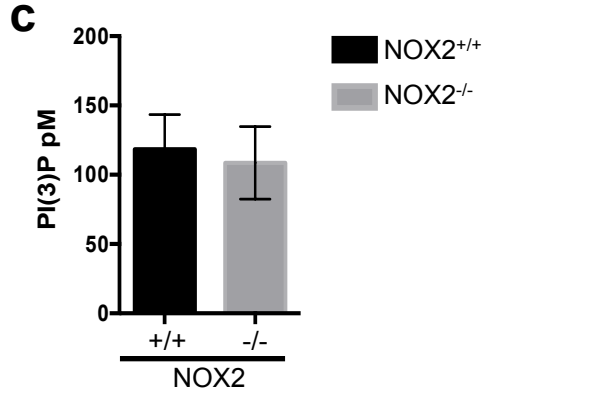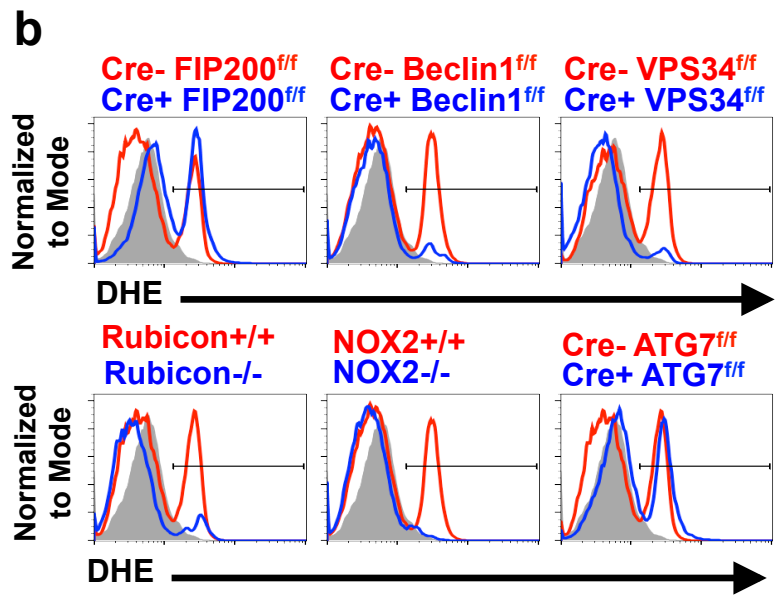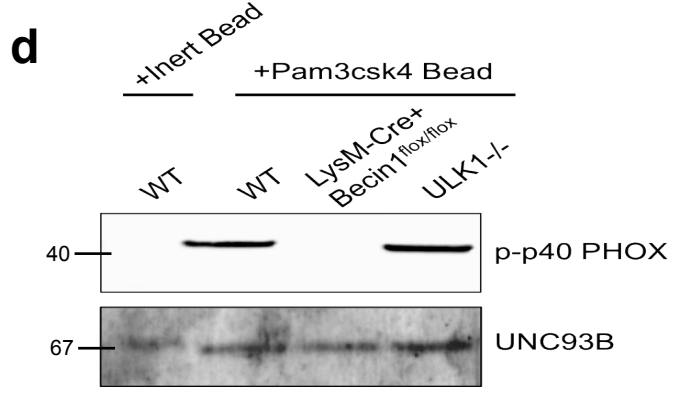



# Supplementary Figure 6: The activity of Rubicon and NOX2 are required for translocation of the downstream conjugation systems to the LAPosome.

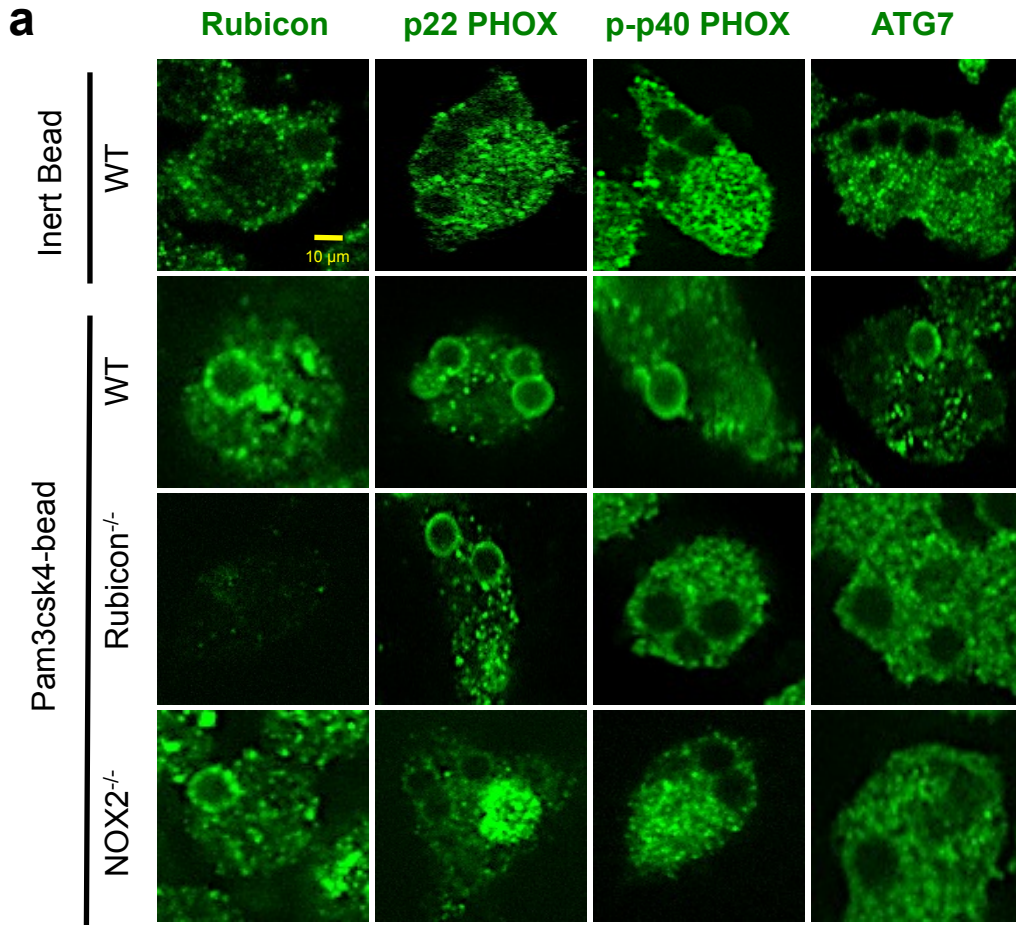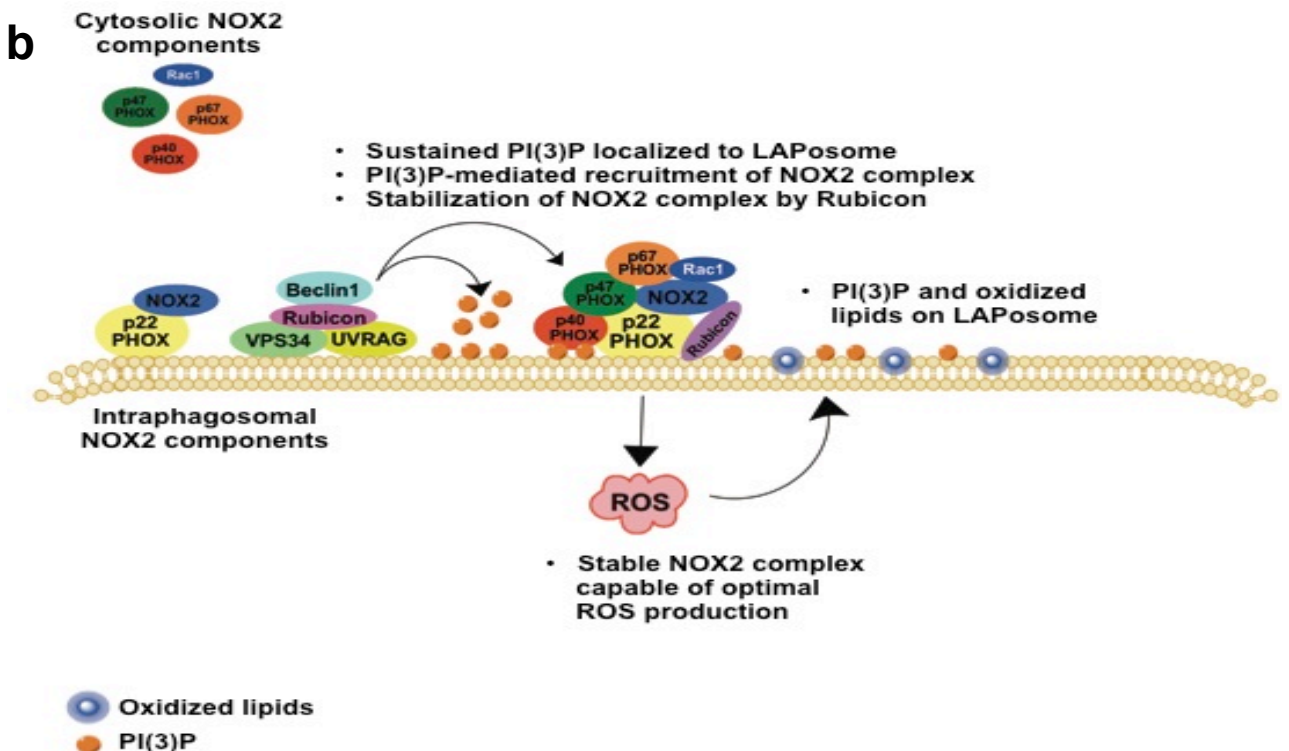

# Supplementary Figure 7: PI(3)P and ROS are both required for LAP

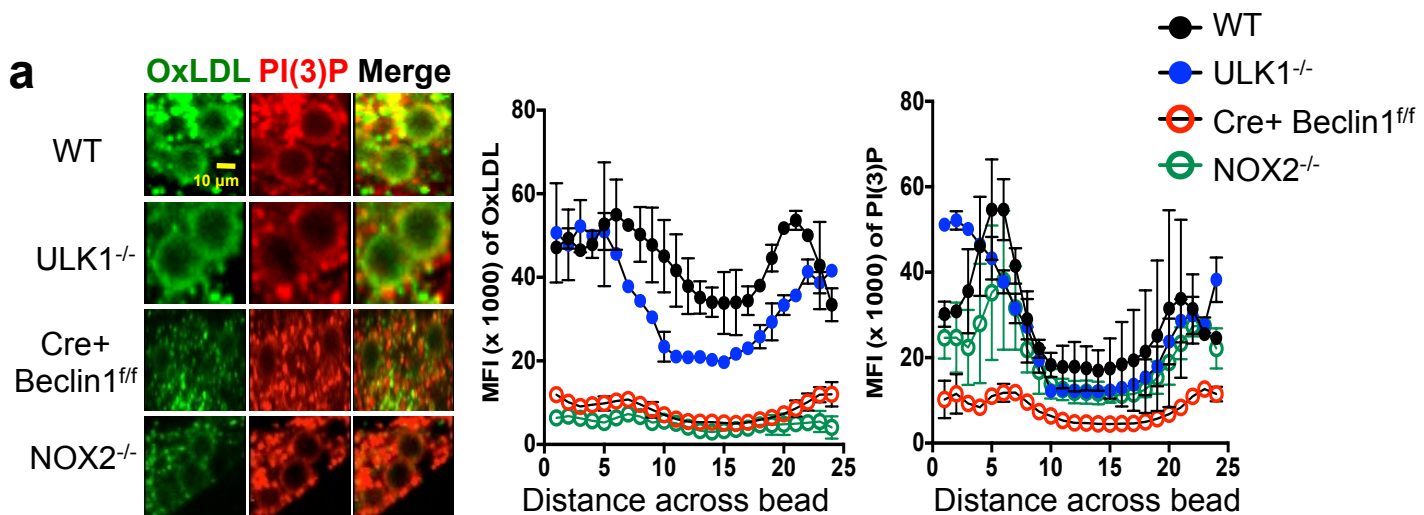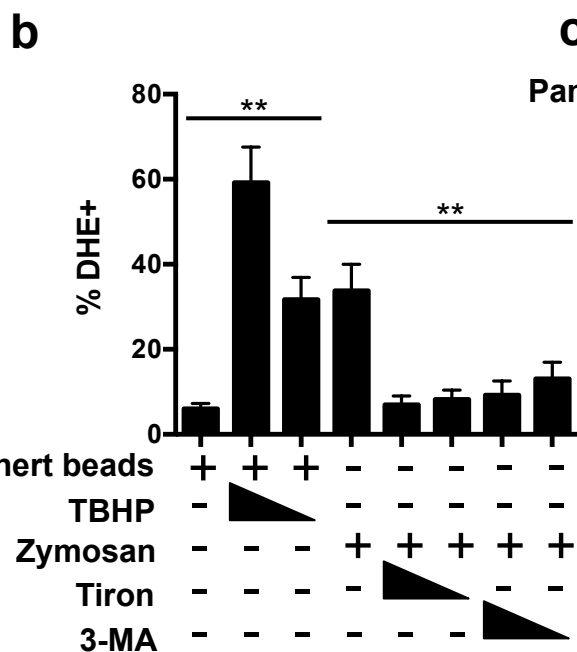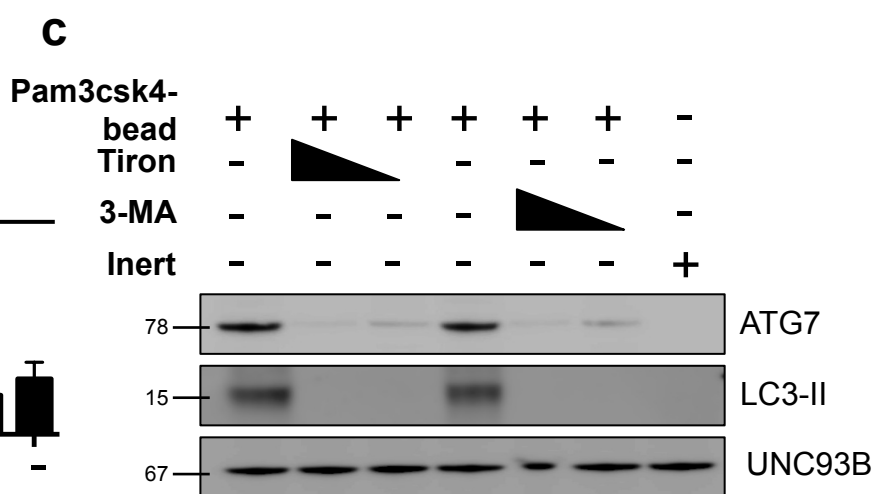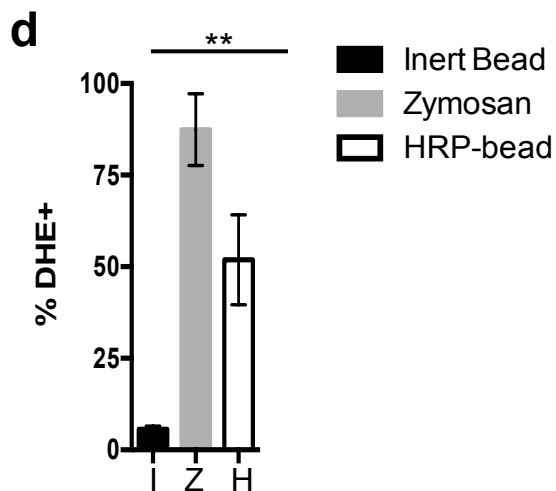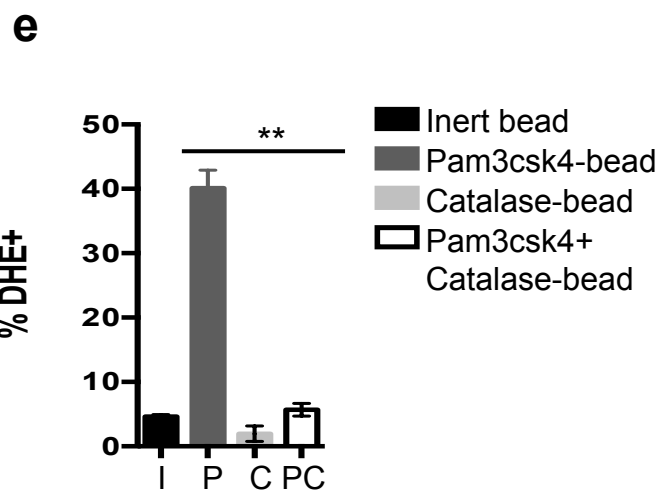



**Supplemental 8: Clearance of *Aspergillus fumigatus* requires LAP.**

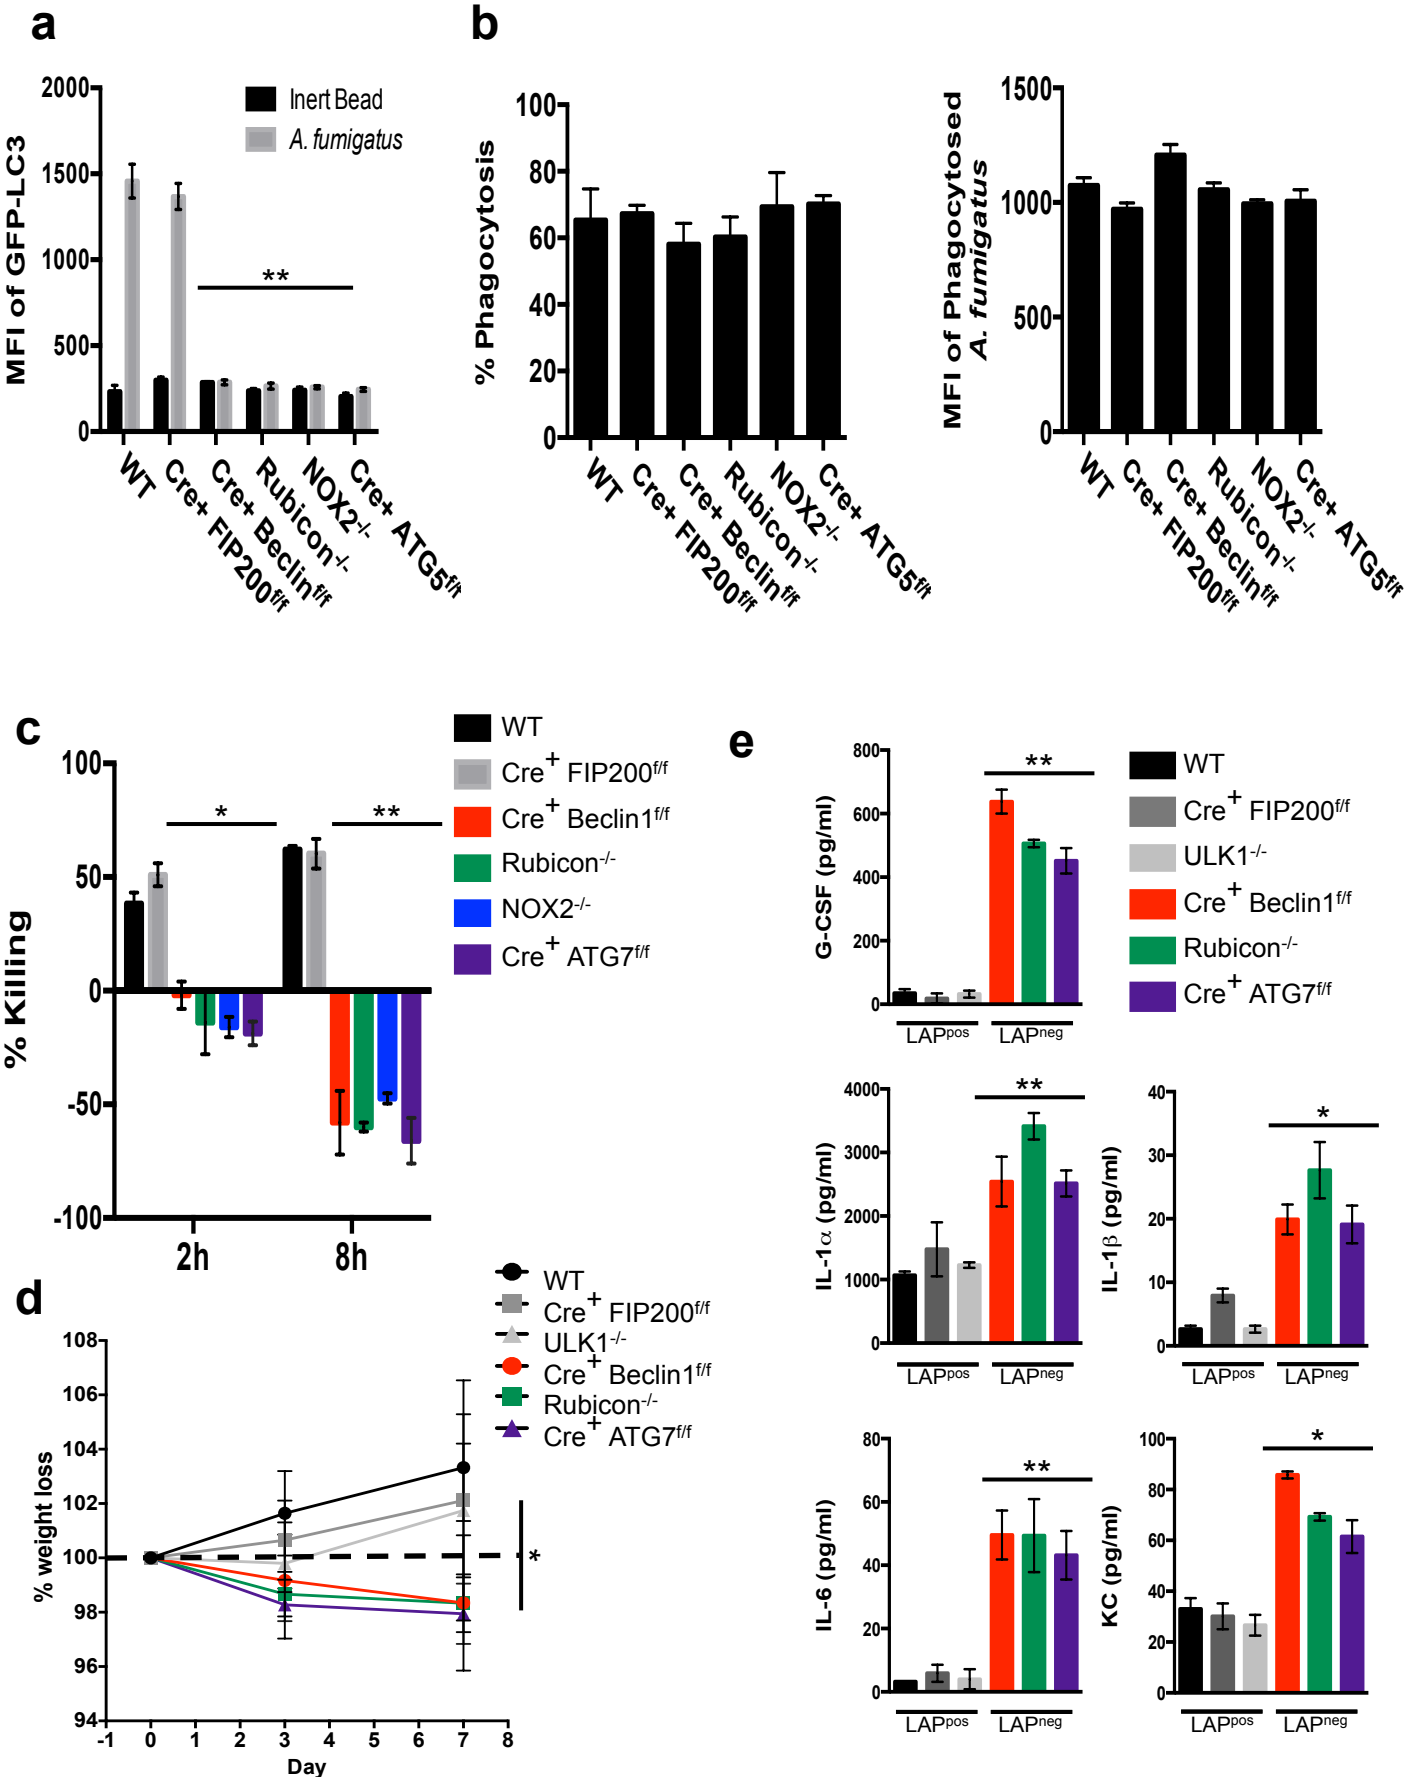

Supplement: NIHMS727811-supplement-Supplemental_Figures.pdf [file NIHMS727811-supplement-Supplemental_Figures.pdf]
